# Supplementary material for: Molecular Docking and Molecular Dynamics Studies of Antidiabetic Phenolic Compound Isolated from Leaf Extract of Englerophytum magalismontanum (Sond.) T.D.Penn.
Source: MDPI journal article supplement (doi:10.3390/molecules27103175), 2022-05-16
Supplement: s1 [file s1]

## SUPPLEMENTARY MATERIAL

NMR Spectra of naringenin isolated from *E. magalismontanum* leaf and recorded on a Varian mercury Plus 300 spectrometer with tetramethylsilane (TSM) as internal standard

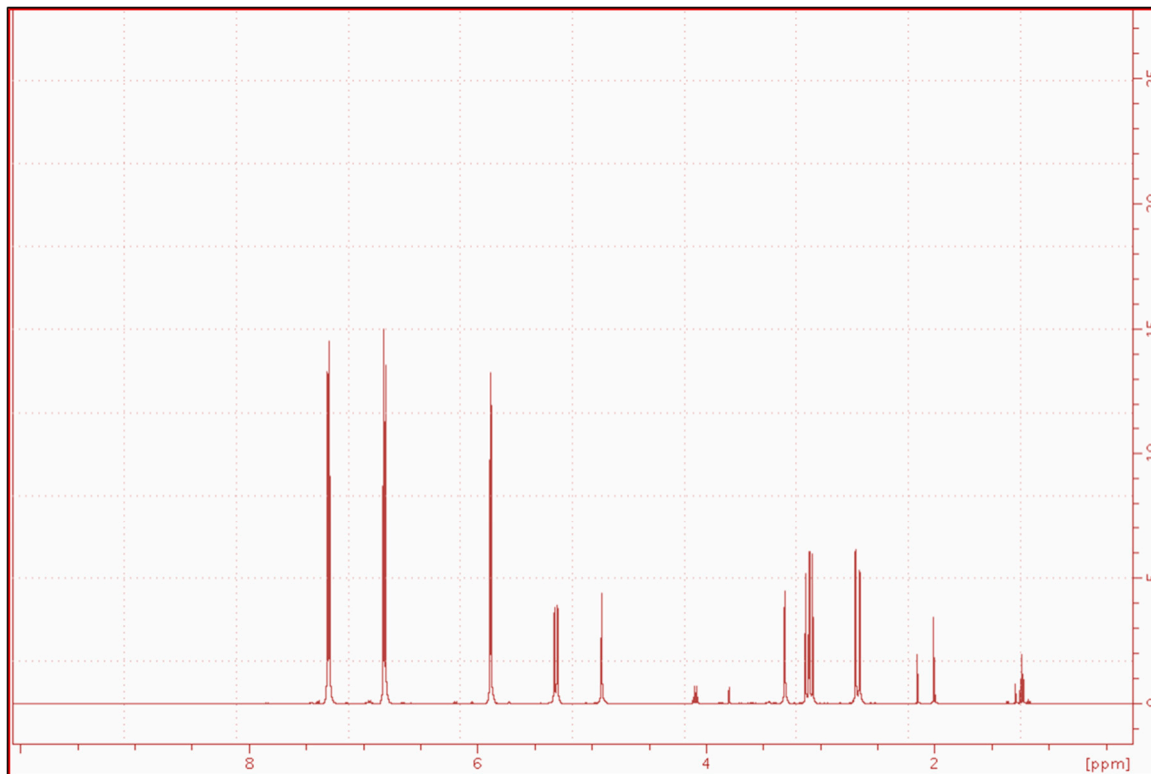

Figure S1.  $^1\text{H}$  (600 MHz,  $\text{CDCl}_3$ ) NMR spectrum of naringenin.

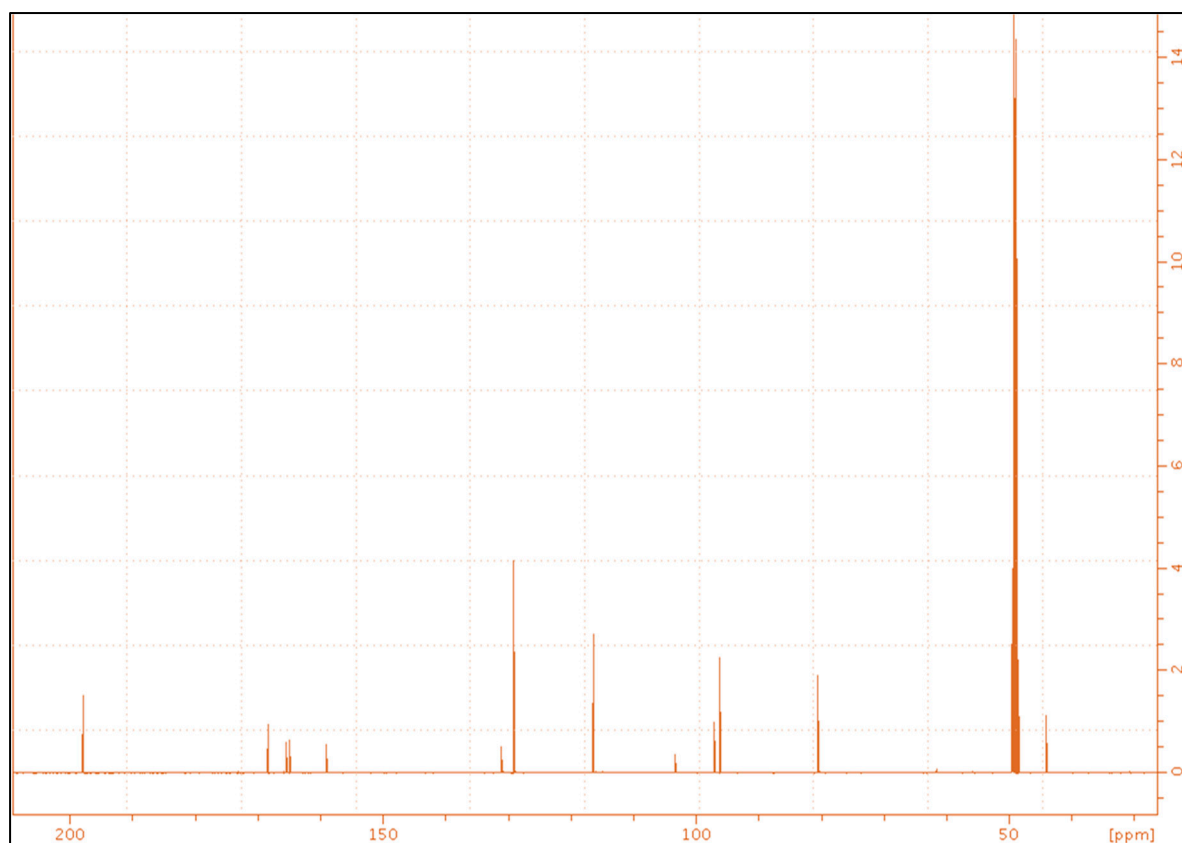

Figure S2.  $^{13}\text{C}$  (100 MHz,  $\text{CDCl}_3$ ) NMR spectrum of naringenin.

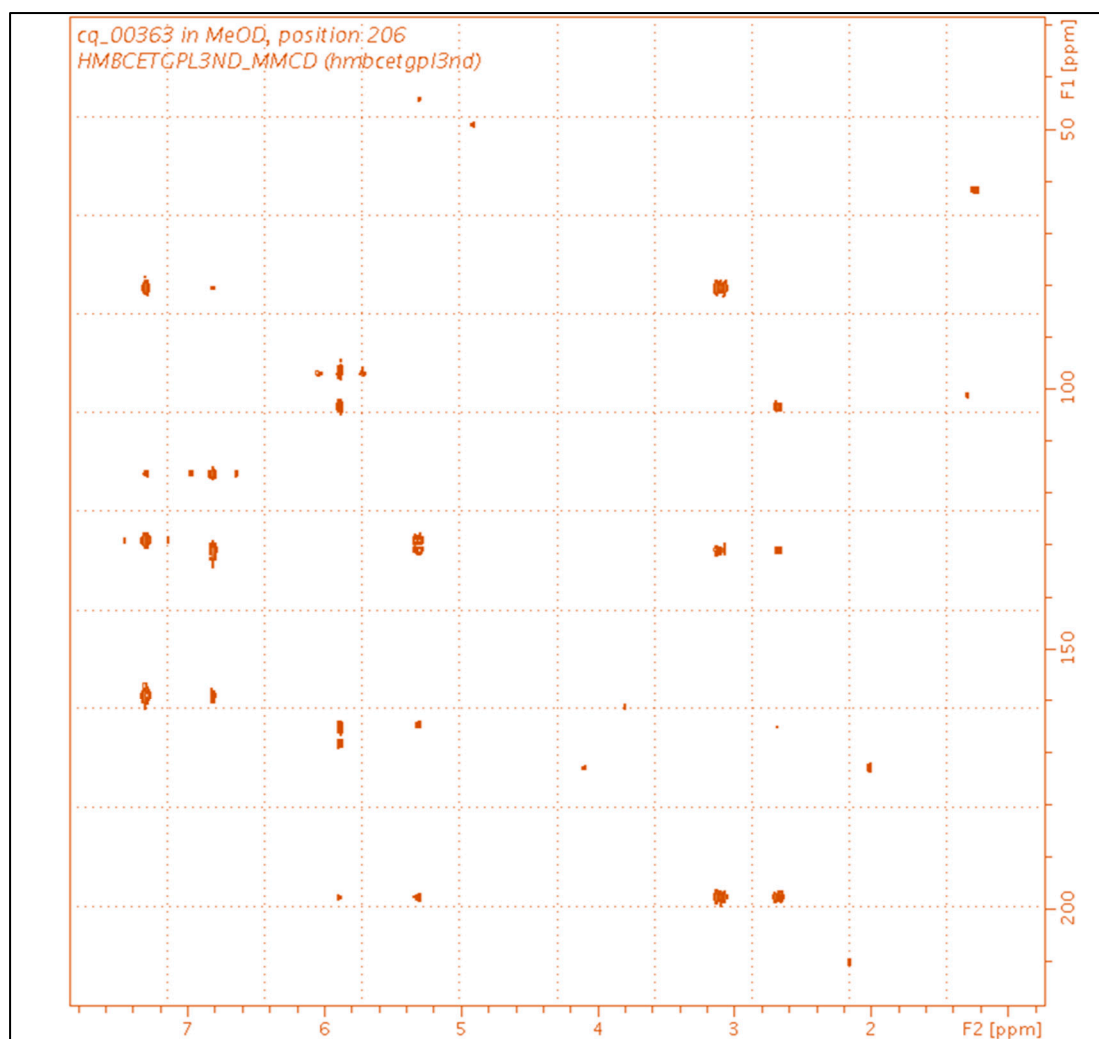

Figure S3.  $^1\text{H}$ - $^{13}\text{C}$  HMBC (600 MHz:  $^1\text{H}$  and 100 MHz:  $^{13}\text{C}$ ;  $\text{CDCl}_3$ ) NMR spectrum of naringenin.

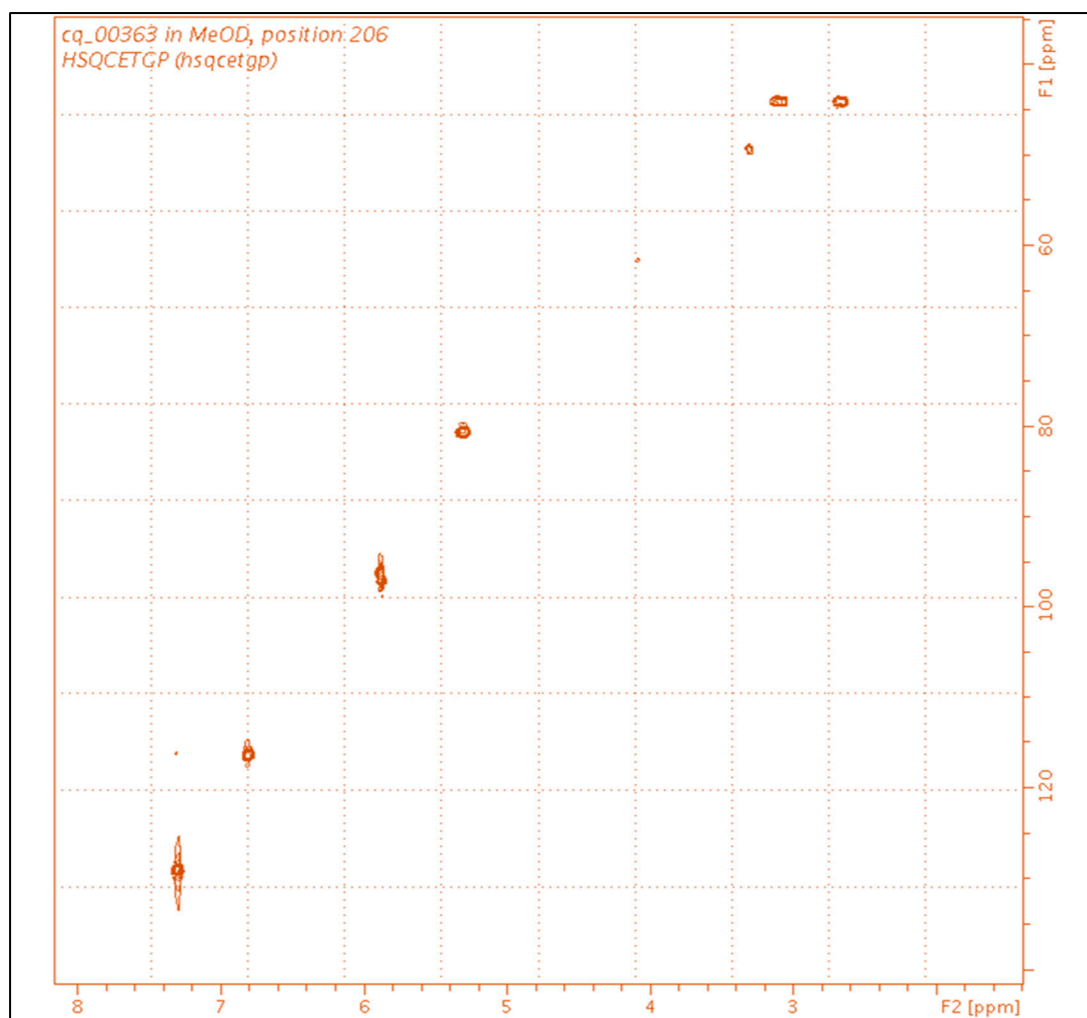

Figure S4.  $^1\text{H}$ - $^{13}\text{C}$  HSQC (600 MHz:  $^1\text{H}$  and 100 MHz:  $^{13}\text{C}$ ;  $\text{CDCl}_3$ ) NMR spectrum of naringenin.
